# Supplementary material for: CXCL8 Associated Dendritic Cell Activation Marker Expression and Recruitment as Indicators of Favorable Outcomes in Colorectal Cancer
Source: PubMed Central journal article supplement (PMC8138166; doi:10.3389/fimmu.2021.667177), 2021-05-07
Supplement: Table_1.pdf [file Table_1.pdf]

**Table S1 Primers used in the experiments.**

| Gene                          | Primer  | Sequence (5'-3')            |
|-------------------------------|---------|-----------------------------|
| <b>Primers for qRT-PCR</b>    |         |                             |
| ICAM-1                        | forward | GCCTGGCATTTCAGAGTCTGCT      |
|                               | reverse | AAACCAGACCCTGGAAGTGCAC      |
| CD83                          | forward | ATGAGCTCCATCCTCAGATGGCAA    |
|                               | reverse | AAAGCACTCACGAGGTTGACCAGA    |
| CD86                          | forward | TCTCCACGGAAACAGCATCT        |
|                               | reverse | CTTACGGAAGCACCCATGAT        |
| <b>Primers for Mycoplasma</b> |         | <b>Sequence (5'-3')</b>     |
| Mycoplasma                    |         | GGGAGCAAACAGGATTAGATACCCT   |
|                               |         | TGCACCATCTGTCACTCTGTTAACCTC |
